# Supplementary material for: Thioglycosynthases: double mutant glycosidases that serve as scaffolds for thioglycoside synthesis
Source: Royal Society of Chemistry journal article supplement (doi:10.1039/b313155f), 2004-01-01
Supplement: b313155f.doc [file b313155f.doc]

**Thioglycosynthases: double mutant glycosidases that serve as scaffolds for thioglycoside synthesis**

Michael Jahn,*a* Hongming Chen,*a* Johannes Müllegger,*a* Jennifer Marles,*b* R. Antony J. Warren*b* and Stephen G. Withers*a*

a Department of Chemistry, University of British Columbia, 2036 Main Mall, Vancouver, B.C. V6T 1Z1, Canada. Tel: (+1) 604-822-3402; Fax: (+1) 604-822-8869; E-mail:withers@chem.ubc.ca

*bDepartment of Microbiology & Immunology, University of British Columbia, 6174 University Boulevard, Vancouver, B.C. V6T 1Z3*

**Construction of Abg E171A, E358G by site directed mutagenesis:**

The E171A mutation was introduced using the megaprimer method and pET29AbgE358G as template (C. Mayer, D.L. Zechel, S.P. Reid, R.A.J. Warren and S.G. Withers., *FEBS Lett.*, 2000, **466**, 40). The primers used were p29fwd (5' GGG GAC AAG TTT GTA CAA AAA AGC AGG CTA AGA AGG AGA TAT ACA TAT G) and AbgE171A (5' CGC GCA CCA AGG **CGC** GTT GAA CGT TGC AAC CGC ATC) in the first reaction. For the second reaction the product of the first PCR served as megaprimer in combination with p29rev (5' GGG GAC CAC TTT GTA CAA GAA AGC TGG GTC TCA GTG GTG GTG GTG GTG). The resulting product was inserted into the pDONR201 vector and subsequently transferred to pDEST14 using the Gateway cloning system (Gateway Cloning Technology Manual Version 1. GibcoBRL Life Technologies). The *att*B1 and *att*B2 sequences necessary for recombination are underlined, the mutated codon is shown in bold letters. Protein expression and purification was done as described previously (C. Mayer, D.L. Zechel, S.P. Reid, R.A.J. Warren and S.G. Withers., *FEBS Lett.*, 2000, **466**, 40).

**CD spectroscopy:**

Circular Dichroism spectra were obtained of wild type Abg, acid/ base mutant Abg E171A, nucleophile mutant Abg E358G and the double mutant Abg E171A, E358G (~10‑6 M in 10 mM HEPES, pH ~7.0, RT) using a Jasco J810 Spectropolarimeter in the range of 200-240 nm:

Melting curves were obtained by monitoring the decay of the CD signal at 222 nm while heating the samples from 45-75C at a rate of 1C min-1 (~10-6 M protein in 10 mM HEPES, pH ~7.0, RT).

**Enzymatic synthesis, acetylation and purification of thio-linked cellobiosides:**

Phosphate buffered (100 mM, pH 7, degassed) suspensions of pNP 4-deoxy-4-thio--D-glucopyranoside or methylumbelliferyl 4-deoxy-4-thio--D-glucopyranoside (15 mM) and -glucosyl fluoride (40 mM) were incubated with Abg E171A, E358G (~0.5 mg/ ml) at RT for 12 h under N2. After lyophilization standard per-*O*-acetylation with pyridine/ Ac2O and subsequent workup was performed. The final purification by column chromatography (5:1  1:1 petrol ether/EtOAc) yielded the per-*O*-acetylated products.

*p-Nitrophenyl (2,3,4,6-tetra-O-acetyl--D-glucopyranosyl)-(14)-S-2,3,6-tri-O-acetyl-4-deoxy-4-thio--D-glucopyranoside (****1****):*

32 mg (51%); 1H-NMR (400 MHz) and 13C-NMR (100 MHz) data were the same as described previously (M. Jahn, J. Marles, R.A.J. Warren and S.G. Withers., *Angew. Chem., Int. Ed.*, 2003, **42**, 352).

*Methylumbelliferyl (2,3,4,6-tetra-O-acetyl--D-glucopyranosyl)-(14)-S-2,3,6-tri-O-acetyl-4-deoxy-4-thio--D-glucopyranoside (****2****):*

23 mg (45%); 1H-NMR (400 MHz): H (CDCl3): 7.51 (d, 1 H, *J* 8.8 Hz, MU: Ar), 6.98 (d, 1 H, *J* 2.4 Hz, MU: Ar), 6.92 (dd, 1 H, *J* 8.8 Hz, *J* 2.4 Hz, MU: Ar), 6.19 (d, 1 H, *J* 1.1 Hz, MU: ‑CHCO‑), 5.30-5.10 (m, 4 H, H-1, H-2, H-3, H-3’), 5.04 (t, 1 H, *J*4’,3’ = *J*4’,5’ 9.8 Hz, H-4’), 4.94 (t, 1 H, *J*2’,3’ = *J*2’,1’ 9.8 Hz, H-2’), 4.76 (d, 1 H, *J*1’,2’ 9.8 Hz, H-1’), 4.67 (dd, 1 H, *J*6,6 12.0 Hz, *J*6,5 1.9 Hz, H-6), 4.39 (dd, 1 H, *J*6,6 12.0 Hz, *J*6,5 5.8 Hz, H-6), 4.26 (dd, 1 H, *J*6’,6’ 12.5 Hz, *J*6’,5’ 2.3 Hz, H-6’), 4.15 (dd, 1 H, *J*6’,6’ 12.5 Hz, *J*6’,5’ 5.4 Hz, H-6’), 4.04 (m, 1 H, H-5), 3.75 (m, 1 H, H-5’), 3.03 (t, 1 H, *J*4,5 *= J*4,3 10.7 Hz, H-4), 2.04 (d, 3 H, *J* 1.1 Hz, MU: -CH3), 2.11 (2x), 2.09, 2.07, 2.04, 2.03, 2.00 (6s, 21 H, 7x -COCH3); 13C-NMR (75 MHz): C (CDCl3): 170.4, 170.3, 170.0, 170.0, 169.4 (2x), 169.2, 160.6, 159.2, 154.8, 152.0, 152.7, 115.5, 114.0, 113.2, 104.2, 98.4, 81.7, 77.2 (2x), 76.0, 74.6, 73.6, 72.4, 70.3, 70.1, 68.1, 63.4, 62.2, 46.0, 20.8, 20.7, 20.6, 20.5 (3x), 20.5, 18.6; ESI-MS: *m/z* = 811.8 [M + H]+ (expected for C36H43O19S+: *m/z* = 811.8).

**Kinetic analysis:**

Kinetic analysis was performed by monitoring fluoride release with the aid of a fluoride sensitive electrode (ORION Ionplus Fluoride) at 27C in 100 mM phosphate buffer/ 145 mM NaCl at pH 6.0, 6.9 and 8.0.

Kinetic parameters for the acceptor pNP 4-deoxy-4-thio--D-glucopyranoside at 17 mM donor -glucosyl fluoride were estimated with ~10 M Abg E171A, E358G. Down to concentrations of ~50 M acceptor there was no appreciable decrease in rate of fluoride release detectable, making the exact determination of *K*’M for the acceptor impossible, as at lower concentrations non-Michaelis-Menton kinetics apply due to similar concentrations of enzyme and substrate. Kinetic parameters for the donor were determined at saturating concentrations of acceptor (200 M) at ~10 M Abg E171A, E358G.
